# Supplementary material
Source: PubMed Central journal article supplement (PMC3580834)
Supplement: NIHMS443670-supplement-Supplemental_information_2.pdf [file NIHMS443670-supplement-Supplemental_information_2.pdf]

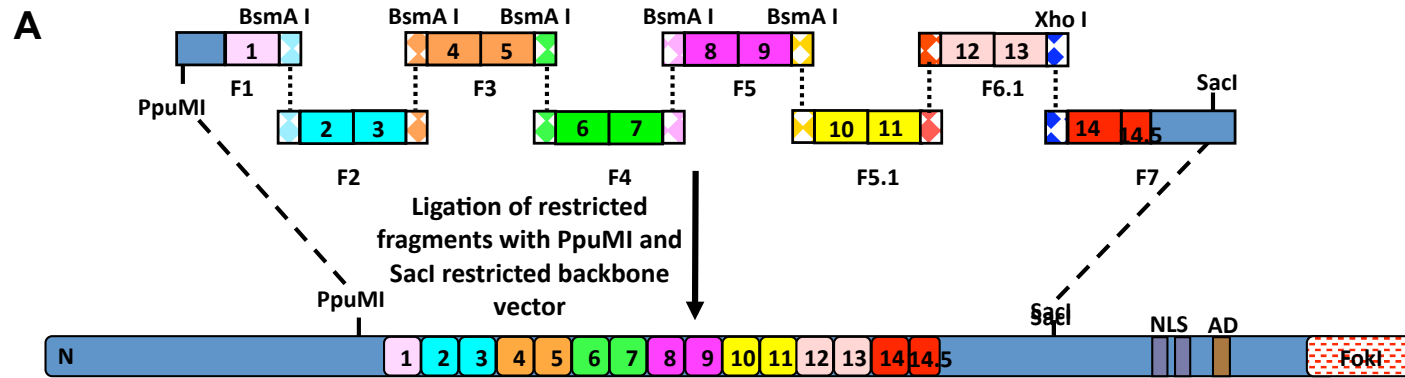

**B**

For 15 repeats assembly

|                              | PpuMI                                                                                | BsmAI                                                                                  | BsmAI                                                                                  | BsmAI                                                                                  | BsmAI                                                                                  | BsmAI                                                                                    | BsmAI                                                                                    | BsmAI                                                                                  | XhoI | SacI                                                                                |                           |
|------------------------------|--------------------------------------------------------------------------------------|----------------------------------------------------------------------------------------|----------------------------------------------------------------------------------------|----------------------------------------------------------------------------------------|----------------------------------------------------------------------------------------|------------------------------------------------------------------------------------------|------------------------------------------------------------------------------------------|----------------------------------------------------------------------------------------|------|-------------------------------------------------------------------------------------|---------------------------|
| N-terminal dHax3 backbone    | $\begin{array}{ c } \hline \text{GTC} \\ \hline \text{CAG} \\ \hline \end{array}$ F1 | $\begin{array}{ c } \hline \text{TTCC} \\ \hline \text{AAGG} \\ \hline \end{array}$ F2 | $\begin{array}{ c } \hline \text{CACC} \\ \hline \text{GTGG} \\ \hline \end{array}$ F3 | $\begin{array}{ c } \hline \text{GTCC} \\ \hline \text{CAGG} \\ \hline \end{array}$ F4 | $\begin{array}{ c } \hline \text{CCCT} \\ \hline \text{GGGA} \\ \hline \end{array}$ F5 | $\begin{array}{ c } \hline \text{CACT} \\ \hline \text{GTGA} \\ \hline \end{array}$ F5.1 | $\begin{array}{ c } \hline \text{CTCT} \\ \hline \text{GAGA} \\ \hline \end{array}$ F6.1 | $\begin{array}{ c } \hline \text{TCGA} \\ \hline \text{AGCT} \\ \hline \end{array}$ F7 |      | $\begin{array}{ c } \hline \text{AGCT} \\ \hline \text{TCGA} \\ \hline \end{array}$ | C-terminal dHax3 backbone |
| Number of RVDs               | 1                                                                                    | 2                                                                                      | 2                                                                                      | 2                                                                                      | 2                                                                                      | 2                                                                                        | 2                                                                                        | 2                                                                                      |      |                                                                                     |                           |
| Length of each fragment (bp) | 192                                                                                  | 234                                                                                    | 161                                                                                    | 193                                                                                    | 204                                                                                    | 204                                                                                      | 207                                                                                      | 541                                                                                    |      |                                                                                     |                           |

Supplemental Figure 1
