# Supplementary material
Source: PubMed Central journal article supplement (PMC3580834)
Supplement: NIHMS443670-supplement-Supplemental_information_3.pdf [file NIHMS443670-supplement-Supplemental_information_3.pdf]

idTALE

idtale.kaust.edu.sa/gene\_id.html



جامعة الملك عبد الله  
للعلوم والتقنية  
King Abdullah University of  
Science and Technology

# in silico designer TALEs

A web tool for TALEN design and target finding

Home Manual ATGC

Design custom TALEN

Search for TALEN target

## idTALE

### Design a custom TALEN providing gene id

Here we guarantee that TALEN will target the coding region.

Species:

Spacer size:  (in base pairs; "from,to" e.g. 16,18 or just 16)

Length of TALE:  (as #RVDs; e.g. 13)

Ensembl Gene Id:  (e.g. AT4G14276 for Arabidopsis thaliana)

© 2011 All Rights Reserved. King Abdullah University of Science and Technology

- Design custom TALEN
- Search for TALEN target

# idTALE

## Design a custom TALEN providing a gene id

REPORTED TARGET SEQUENCES ARE IN 5' - 3' FOR CONFORMATION 1  
 AND 3' - 5' FOR CONFORMATION 2

| Species              | Gene      | Transcript  | Chromosome | Strand | Spacer [bp] | TALE length [#RVD] |
|----------------------|-----------|-------------|------------|--------|-------------|--------------------|
| Arabidopsis thaliana | AT4G14210 | AT4G14210.1 | 4          | -1     | 16-18       | 13                 |

Homodimer
  Heterodimer
  Legend

| 1   | 2   | 3   | 4   | 5   | 6   | 7   | 8   | 9   | 10  | 11  | 12  | 13  |
|-----|-----|-----|-----|-----|-----|-----|-----|-----|-----|-----|-----|-----|
| N/A |

Update

| #NS | #NN | Homodimer                              | Forward target | Reverse target | Conf | Spacer | Start (e1) | End (NCBI) |
|-----|-----|----------------------------------------|----------------|----------------|------|--------|------------|------------|
| 3   | 4   | NN NI NN NS NN NS NG NG HD NG NN NS NG | AAGTACTTCTGTT  | GAAGGATTCTACT  | 1    | 18     | 8190715    | 8190758    |
| 3   | 3   | HD NN NS NS NS NN HD NG NN NI NI NK NI | CACCTGCTAAAGA  | CGAAAACGAAGA   | 1    | 18     | 8191470    | 8191513    |
| 3   | 2   | NG HD NS HD NI NN NI NK NN NI NS NK NS | TCTCAAAGAATGA  | TCGCAGAGGAAGC  | 2    | 18     | 8191820    | 8191863    |
| 4   | 2   | NG NS NS NS NG NK NK NI NN NN NS NG NI | TCCATGGAAGCTA  | TAGCTGGAGATTA  | 1    | 17     | 8190703    | 8190745    |
| 4   | 3   | NK NG NN NS NI NS NN NI NS NN NS HD NI | GTAGAGGACGACA  | GTGTACAAGACCA  | 1    | 17     | 8190773    | 8190815    |
| 4   | 4   | NS NN NI NN NS NS NK NN NN NI HD NS NI | TGAGAAGGACTA   | AAATCGAAGCA    | 2    | 18     | 8190944    | 8190987    |

idTALE

idtale.kaust.edu.sa/target\_hom.html

جامعة الملك عبد الله  
للعلوم والتقنية  
King Abdullah University of  
Science and Technology

**in silico designer TALEs**  
A web tool for TALEN design and target finding

Home Manual ATGC

Design custom TALEN

Search for TALEN target

# idTALE

## Search for a TALEN genomic targets (as a homodimer)

Species:

Spacer size:  (in base pairs; "from,to" e.g. 16,18 or just 16)

Max distance to feature:  (in base pairs; e.g. 1000)

Sequence:  
  
(e.g. NS-NG-NG-NK-NG-NN-NG-NN-NK-HD-NS-NG-NN)

© 2011 All Rights Reserved. King Abdullah University of Science and Technology

idTALE

idtale.kaust.edu.sa/cgi-bin/idtale/target\_hom.cgi



جامعة الملك عبد الله  
للعلوم والتقنية  
King Abdullah University of  
Science and Technology

# in silico designer TALEs

A web tool for TALEN design and target finding

Home Manual ATGC

Design custom TALEN

Search for TALEN target

## idTALE

### Search for a TALEN genomic targets (as a homodimer)

YOUR PARAMETERS:  
 SPECIES: *Arabidopsis thaliana*  
 SPACER: 16-18 [bp]  
 TALE LENGTH: 13 [bp]  
 DISTANCE TO FEATURE: 1000  
 TALE HOMODIMER: NN NI NN NS NN NS NG NG HD NG NN NS NG

Your spec Other Legend

| Chromosome | Strand | Start (e!) | End (NCBI) | Conformation | Spacer length | Status           | Distance | Gene name | Gene id     |
|------------|--------|------------|------------|--------------|---------------|------------------|----------|-----------|-------------|
| 1          | 1      | 19480725   | 19480767   | 2            | 17            | Upstream-NON-CDS | 434      | AT1G52315 | AT1G52315   |
| 4          | -1     | 8190715    | 8190758    | 1            | 18            | Overlapping-CDS  | 0        | PDS3      | AT4G14210.2 |
| 4          | -1     | 8190715    | 8190758    | 1            | 18            | Overlapping-CDS  | 0        | PDS3      | AT4G14210.1 |

© 2011 All Rights Reserved. King Abdullah University of Science and Technology
